# Supplementary material
Source: Copernicus journal article supplement (doi:10.5194/essd-2026-353)
Supplement: Supplementary file 1 [file essd-2026-353-supplement.pdf]

# Supplementary Materials for “An 8-day Antarctic supraglacial lake dataset from MODIS”

Shuo Wei<sup>1,2</sup>, Lei Zheng<sup>1,2</sup>, Qi Liang<sup>1,2</sup>, Teng Li<sup>1,2</sup>, Xiao Cheng<sup>1,2</sup>

<sup>1</sup>School of Geospatial Engineering and Science, Sun Yat-sen University, and Southern Marine Science and Engineering  
5 Guangdong Laboratory (Zhuhai), Zhuhai 519082, China

<sup>2</sup>Key Laboratory of Comprehensive Observation of Polar Environment (Sun Yat-sen University), Ministry of Education, Zhuhai 519082, China

*Correspondence to:* Lei Zheng (zhenglei6@mail.sysu.edu.cn)

## **This file includes**

- 10 Supplementary Text S1
- Supplementary Figures S1–S2
- Supplementary Table S1
- Supplementary References

## **1 Supplementary text**

- 15 The threshold criteria proposed by Corr et al. (2022) are designed to extract pure water endmembers from Sentinel-2 and Landsat 8 imagery. In contrast, the objective of this study is to identify all potential lake-containing pixels in MODIS imagery, including both pure and mixed pixels. To meet this objective, the thresholds for NDWI<sub>ice</sub> and NDWI are recalibrated (Fig. S1). Specifically, 10 m resolution lake classification results derived from Sentinel-2 imagery are aggregated to the MODIS pixel scale using a max-pooling approach to generate binary SGL labels. These labels are used as reference data to
- 20 systematically evaluate combinations of NDWI<sub>ice</sub> and NDWI thresholds. The optimal thresholds are determined by maximizing the F1 score. Given that the classification framework consists of two stages, the primary goal of the first stage is to identify as many potential lake pixels as possible to provide candidate inputs for the subsequent classification model. Therefore, in the F1 score calculation, recall is assigned a weight of 1.5 times that of precision, ensuring that potential lake pixels are preferentially detected while maintaining acceptable classification performance.

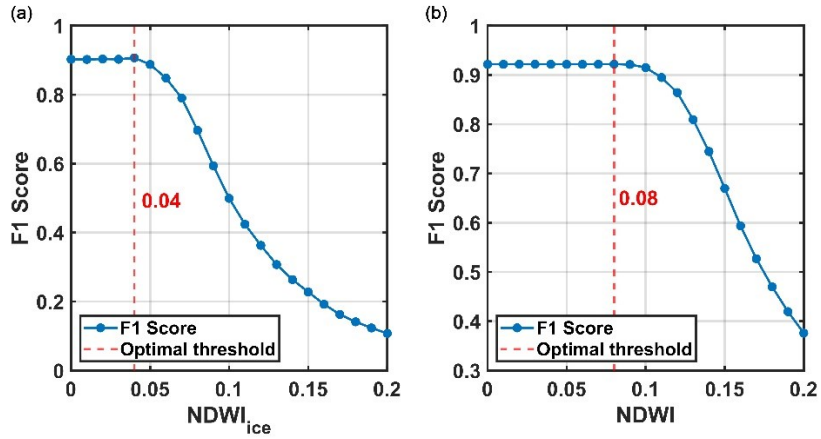

Figure S1: Optimal threshold determination curves for NDWIce and NDWI based on F1 score: (a) NDWIce; (b) NDWI.

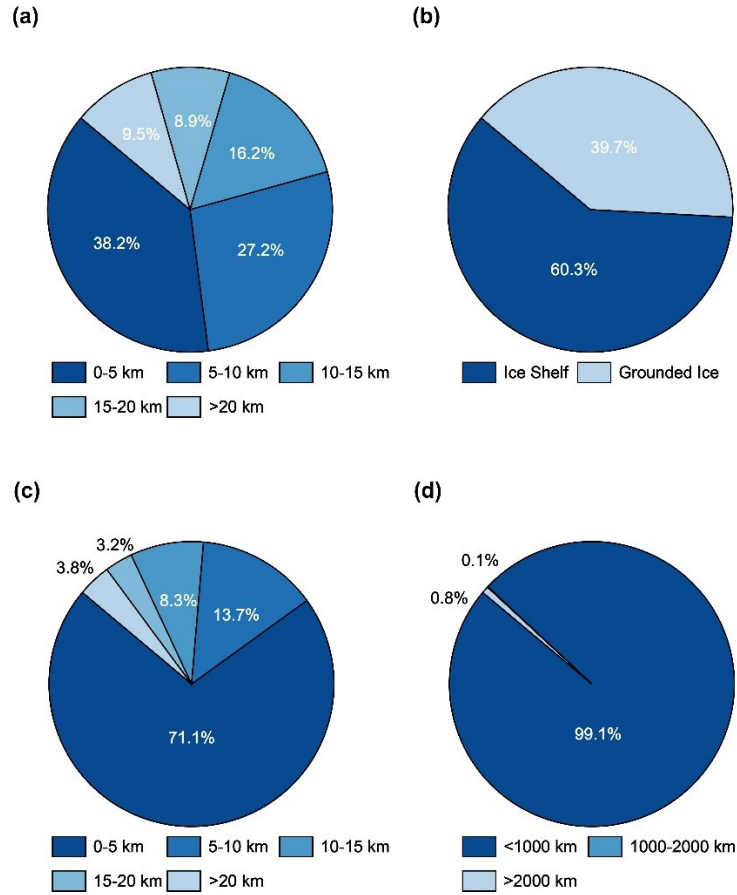

- 30 **Figure S2: Percentage distribution of the mean maximum SGL area across different regional classifications. (a) Distance to grounding lines; (b) Ice shelves and grounded ice; (c) Distance to blue ice and rock; (d) Elevation.**

### 3 Supplementary table

**Table S1. Summary of Sentinel-2 images used in this study**

| Scene ID                               | Date       | Tile   | Satellite | Purpose                 |
|----------------------------------------|------------|--------|-----------|-------------------------|
| 20210123T131909_20210123T131908_T18DXF | 01/23/2021 | T18DXF | 2B        | Training and validation |
| 20210123T131909_20210123T131908_T19DDA | 01/23/2021 | T19DDA | 2B        | Training and validation |
| 20180204T124901_20180204T124902_T19DEA | 02/04/2018 | T19DEA | 2A        | Training and validation |
| 20200119T131859_20200119T131902_T19DEB | 01/19/2020 | T19DEB | 2B        | Training and validation |
| 20200119T131859_20200119T131902_T19DEA | 01/19/2020 | T19DEA | 2B        | Training and validation |
| 20210123T131909_20210123T131908_T19DEB | 01/23/2021 | T19DEB | 2B        | Training and validation |
| 20200217T034629_20200217T034623_T42DWF | 02/17/2020 | T42DWF | 2B        | Training and validation |
| 20190113T034629_20190113T034626_T42DWF | 01/13/2019 | T42DWF | 2B        | Training and validation |
| 20190222T034629_20190222T034626_T42DXG | 02/22/2019 | T42DXG | 2B        | Training and validation |
| 20190222T034629_20190222T034626_T42DXH | 02/22/2019 | T42DXH | 2B        | Training and validation |
| 20190222T034629_20190222T034626_T43DDB | 02/22/2019 | T43DDB | 2B        | Training and validation |
| 20190222T034629_20190222T034626_T43DDC | 02/22/2019 | T43DDC | 2B        | Training and validation |
| 20190217T094019_20190217T094019_T28CFE | 02/17/2019 | T28CFE | 2B        | Training and validation |
| 20190217T094019_20190217T094019_T29CMV | 02/17/2019 | T29CMV | 2B        | Training and validation |
| 20190217T094019_20190217T094019_T28DFF | 02/17/2019 | T28DFF | 2B        | Training and validation |
| 20190217T094019_20190217T094019_T29DMA | 02/17/2019 | T29DMA | 2B        | Training and validation |
| 20200129T063819_20200129T063818_T35DPC | 01/29/2020 | T35DPC | 2B        | Training and validation |
| 20200129T063819_20200129T063818_T36DVH | 01/29/2020 | T36DVH | 2B        | Training and validation |
| 20180206T064741_20180206T064738_T35DPC | 02/06/2018 | T35DPC | 2A        | Training and validation |
| 20180206T064741_20180206T064738_T36DVH | 02/06/2018 | T36DVH | 2A        | Training and validation |
| 20200118T070839_20200118T070839_T35DNB | 01/18/2020 | T35DNB | 2B        | Training and validation |
| 20170127T041721_20170127T041717_T41CPV | 01/27/2017 | T41CPV | 2A        | Independent test        |
| 20170127T041721_20170127T041717_T41DPA | 01/27/2017 | T41DPA | 2A        | Independent test        |
| 20170127T041721_20170127T041717_T42CVE | 01/27/2017 | T42CVE | 2A        | Independent test        |

|                                        |            |        |    |                  |
|----------------------------------------|------------|--------|----|------------------|
| 20170127T041721_20170127T041717_T42CWE | 01/27/2017 | T42CWE | 2A | Independent test |
| 20170127T041721_20170127T041717_T42DVF | 01/27/2017 | T42DVF | 2A | Independent test |
| 20170127T041721_20170127T041717_T42DWF | 01/27/2017 | T42DWF | 2A | Independent test |
| 20170126T080921_20170126T080920_T32DNG | 01/26/2017 | T32DNG | 2A | Independent test |
| 20170126T080921_20170126T080920_T32DNH | 01/26/2017 | T32DNH | 2A | Independent test |
| 20170126T080921_20170126T080920_T32DPG | 01/26/2017 | T32DPG | 2A | Independent test |
| 20170126T080921_20170126T080920_T32DPH | 01/26/2017 | T32DPH | 2A | Independent test |
| 20200126T080919_20200126T080920_T32DNG | 01/26/2020 | T32DNG | 2B | Independent test |
| 20200126T080919_20200126T080920_T32DNH | 01/26/2020 | T32DNH | 2B | Independent test |
| 20200126T080919_20200126T080920_T32DPG | 01/26/2020 | T32DPG | 2B | Independent test |
| 20200126T080919_20200126T080920_T32DPH | 01/26/2020 | T32DPH | 2B | Independent test |
| 20200126T080919_20200126T080920_T33DVB | 01/26/2020 | T33DVB | 2B | Independent test |
| 20200126T080919_20200126T080920_T33DVC | 01/26/2020 | T33DVC | 2B | Independent test |
| 20190102T041719_20190102T041722_T41CPV | 01/02/2019 | T41CPV | 2B | Independent test |
| 20190102T041719_20190102T041722_T41DPA | 01/02/2019 | T41DPA | 2B | Independent test |
| 20190102T041719_20190102T041722_T41DPB | 01/02/2019 | T41DPB | 2B | Independent test |
| 20190102T041719_20190102T041722_T42CVE | 01/02/2019 | T42CVE | 2B | Independent test |
| 20190102T041719_20190102T041722_T42CWE | 01/02/2019 | T42CWE | 2B | Independent test |
| 20190102T041719_20190102T041722_T42DVF | 01/02/2019 | T42DVF | 2B | Independent test |
| 20190102T041719_20190102T041722_T42DVG | 01/02/2019 | T42DVG | 2B | Independent test |
| 20190102T041719_20190102T041722_T42DWF | 01/02/2019 | T42DWF | 2B | Independent test |
| 20190102T041719_20190102T041722_T42DWG | 01/02/2019 | T42DWG | 2B | Independent test |
| 20190103T034629_20190103T034625_T42CWE | 01/03/2019 | T42CWE | 2B | Independent test |
| 20190103T034629_20190103T034625_T42DWF | 01/03/2019 | T42DWF | 2B | Independent test |
| 20190103T034629_20190103T034625_T42DWG | 01/03/2019 | T42DWG | 2B | Independent test |
| 20190103T034629_20190103T034625_T42DXF | 01/03/2019 | T42DXF | 2B | Independent test |
| 20190103T034629_20190103T034625_T42DXG | 01/03/2019 | T42DXG | 2B | Independent test |
| 20191228T005509_20191228T005509_T51DWF | 12/28/2019 | T51DWF | 2B | Independent test |
| 20191228T005509_20191228T005509_T51DWG | 12/28/2019 | T51DWG | 2B | Independent test |
| 20190129T022559_20190129T022553_T47DNG | 01/29/2019 | T47DNG | 2B | Independent test |

|                                        |            |        |    |                  |
|----------------------------------------|------------|--------|----|------------------|
| 20190129T022559_20190129T022553_T47DNH | 01/29/2019 | T47DNH | 2B | Independent test |
| 20190129T022559_20190129T022553_T47DPG | 01/29/2019 | T47DPG | 2B | Independent test |
| 20190129T022559_20190129T022553_T47DPH | 01/29/2019 | T47DPH | 2B | Independent test |

## References

- 35 Corr, D., Leeson, A., McMillan, M., Zhang, C., and Barnes, T.: An inventory of supraglacial lakes and channels across the West Antarctic Ice Sheet, *Earth System Science Data*, 14, 209–228, <https://doi.org/10.5194/essd-14-209-2022>, 2022.
